# Supplementary material for: Deciphering the potential of Cymbopogon citratus (DC.) Stapf as an anti-obesity agent: phytochemical profiling, in vivo evaluations and molecular docking studies
Source: Royal Society of Chemistry journal article supplement (doi:10.1039/d4fo04602a), 2024-01-01
Supplement: d4fo04602a1.pdf [file d4fo04602a1.pdf]

## **Deciphering the Potential of *Cymbopogon citratus* (DC.) Stapf as an Anti-Obesity Agent: Phytochemical Profiling, *in Vivo* Evaluations and Molecular Docking Studies**

Omnia Aly, <sup>+a</sup> Reham Hassan Mekky, <sup>+b</sup> Florbela Pereira, <sup>+c</sup> Yasser M. Diab, <sup>d</sup> Mohamed A. Tammam, <sup>\*d</sup> and Amr El-Demerdash <sup>\*e,f</sup>

<sup>a</sup> Department of Medical Biochemistry, National Research Centre, Cairo 12622, Egypt

<sup>b</sup> Department of Pharmacognosy, Faculty of Pharmacy, Egyptian Russian University, Badr City, Cairo-Suez Road, 11829, Cairo, Egypt

<sup>c</sup> LAQV REQUIMTE, Department of Chemistry, NOVA School of Science and Technology, Universidade Nova de Lisboa, 2829516 Caparica, Portugal

<sup>d</sup> Department of Biochemistry, Faculty of Agriculture, Fayoum University, Fayoum 63514, Egypt

<sup>e</sup> School of Chemistry, Pharmacy and Pharmacology, University of East Anglia, Norwich Research Park, Norwich NR4 7TJ, United Kingdom

<sup>f</sup> Faculty of Sciences, Mansoura University, Mansoura 35516, Egypt

<sup>+</sup> These authors are equally contributed,

---

**\*Corresponding authors:** Amr El-Demerdash (A.E-D), [A.Eldemerdash@uea.ac.uk](mailto:A.Eldemerdash@uea.ac.uk); [a\\_eldemerdash83@mans.edu.eg](mailto:a_eldemerdash83@mans.edu.eg); Mohamed Tammam, (M.T) [mat01@fayoum.edu.eg](mailto:mat01@fayoum.edu.eg)

**Table S1** Pearson's correlation of the evaluated parameters in the studied groups

|                  | Glucose  | Insulin  | HOMA-IR  | Cholesterol | TG       | HDL      | LDL      | Apelin   | Adiponectin | Apelin gene | APJ      | Adiponectin gene |
|------------------|----------|----------|----------|-------------|----------|----------|----------|----------|-------------|-------------|----------|------------------|
| Glucose          | -----    | -0.560** | 0.590**  | 0.927**     | 0.937**  | -0.950** | 0.898**  | -0.829** | -0.882**    | -0.755**    | -0.820** | -0.730**         |
| Insulin          | -0.560** | -----    | 0.231    | -0.537**    | -0.546** | 0.594**  | -0.576** | 0.545**  | 0.599**     | 0.541**     | 0.524**  | 0.516**          |
| HOMA-IR          | 0.590**  | 0.231    | -----    | 0.600**     | 0.575**  | -0.548** | 0.526**  | -0.483** | -0.525**    | -0.444**    | -0.483** | -0.457**         |
| Cholesterol      | 0.927**  | -0.537** | 0.600**  | -----       | 0.934**  | -0.966** | 0.972**  | -0.898** | -0.940**    | -0.829**    | -0.860** | -0.812**         |
| TG               | 0.937**  | -0.546** | 0.575**  | 0.934**     | ----     | -0.956** | 0.920**  | -0.881** | -0.892**    | -0.778**    | -0.820** | -0.758**         |
| HDL              | -0.950** | 0.594**  | -0.548** | -0.966**    | -0.956** | -----    | -0.950** | 0.889**  | 0.921**     | 0.830**     | 0.879**  | 0.817**          |
| LDL              | 0.898**  | -0.576** | 0.526**  | 0.972**     | 0.920**  | -0.950** | ----     | -0.883** | -0.931**    | -0.824**    | -0.853** | -0.826**         |
| Apelin           | -0.829** | 0.545**  | -0.483** | -0.898**    | -0.881** | 0.889**  | -0.883** | -----    | 0.865**     | 0.826**     | 0.836**  | 0.774**          |
| Adiponectin      | -0.882** | 0.599**  | -0.525** | -0.940**    | -0.892** | 0.921**  | -0.931** | 0.865**  | -----       | 0.846**     | 0.849**  | 0.852**          |
| Apelin gene      | -0.755** | 0.541**  | -0.444** | -0.829**    | -0.778** | 0.830**  | -0.824** | 0.826**  | 0.846**     | -----       | 0.950**  | 0.924**          |
| APJ              | -0.820** | 0.524**  | -0.483** | -0.860**    | -0.820** | 0.879**  | -0.853** | 0.836**  | 0.849**     | 0.950**     | ----     | 0.888**          |
| Adiponectin gene | -0.730** | 0.516**  | -0.457** | -0.812**    | -0.758** | 0.817**  | -0.826** | 0.774**  | 0.852**     | 0.924**     | 0.888**  | -----            |

\* p<0.05 - \*\* p<0.001

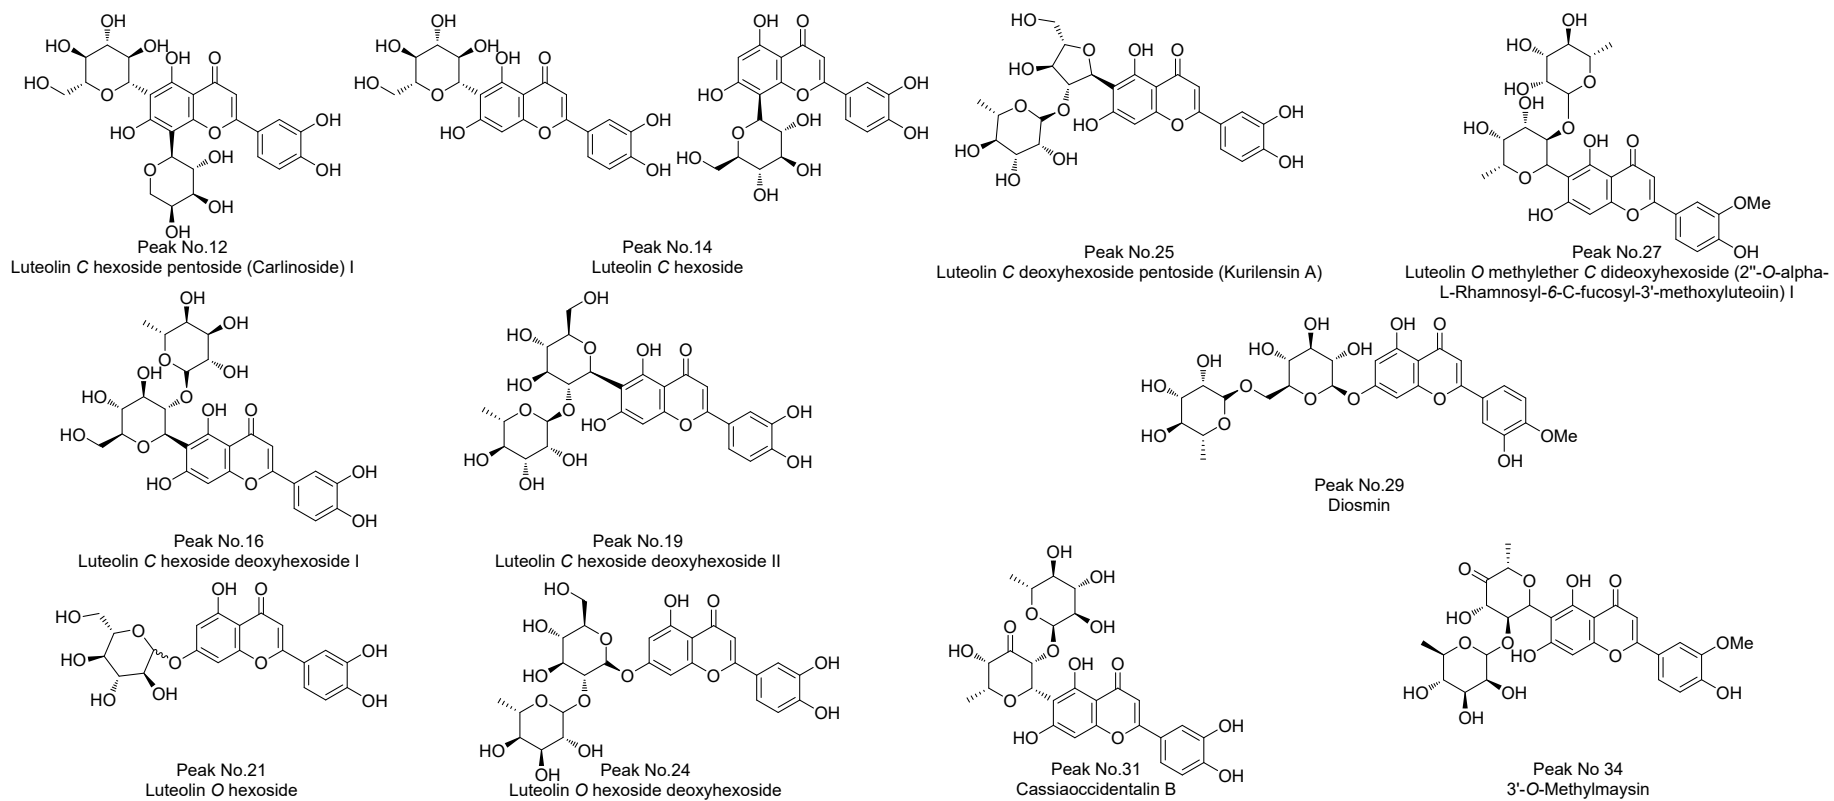

**Fig. S1.** Detected Flavones (luteolin) derivatives in the examined extract.

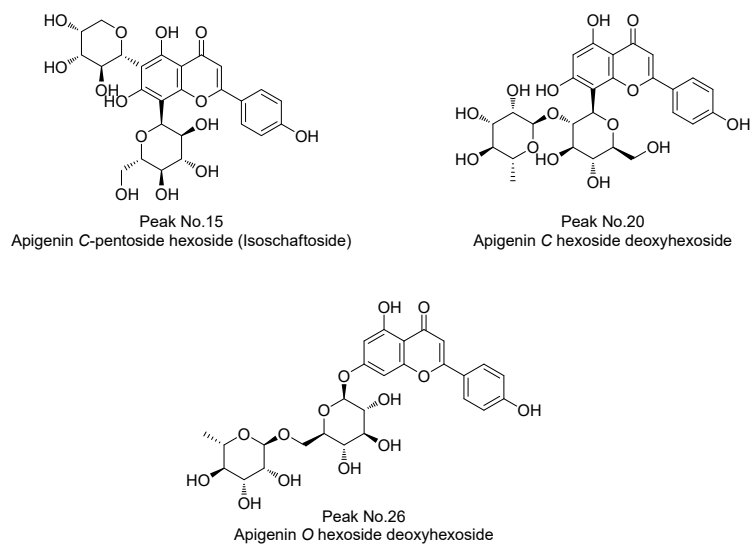

**Fig. S2.** Detected Flavones (apigenin) derivatives in the examined extract.

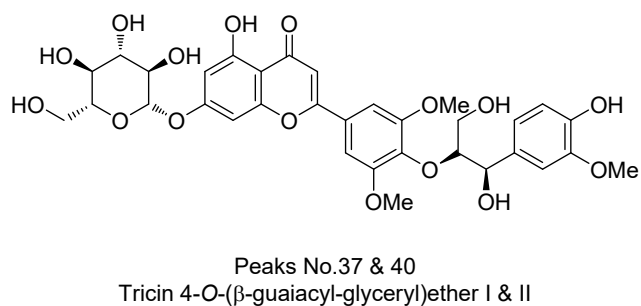

**Fig. S3.** Detected Flavones (tricin) derivatives in the examined extract.

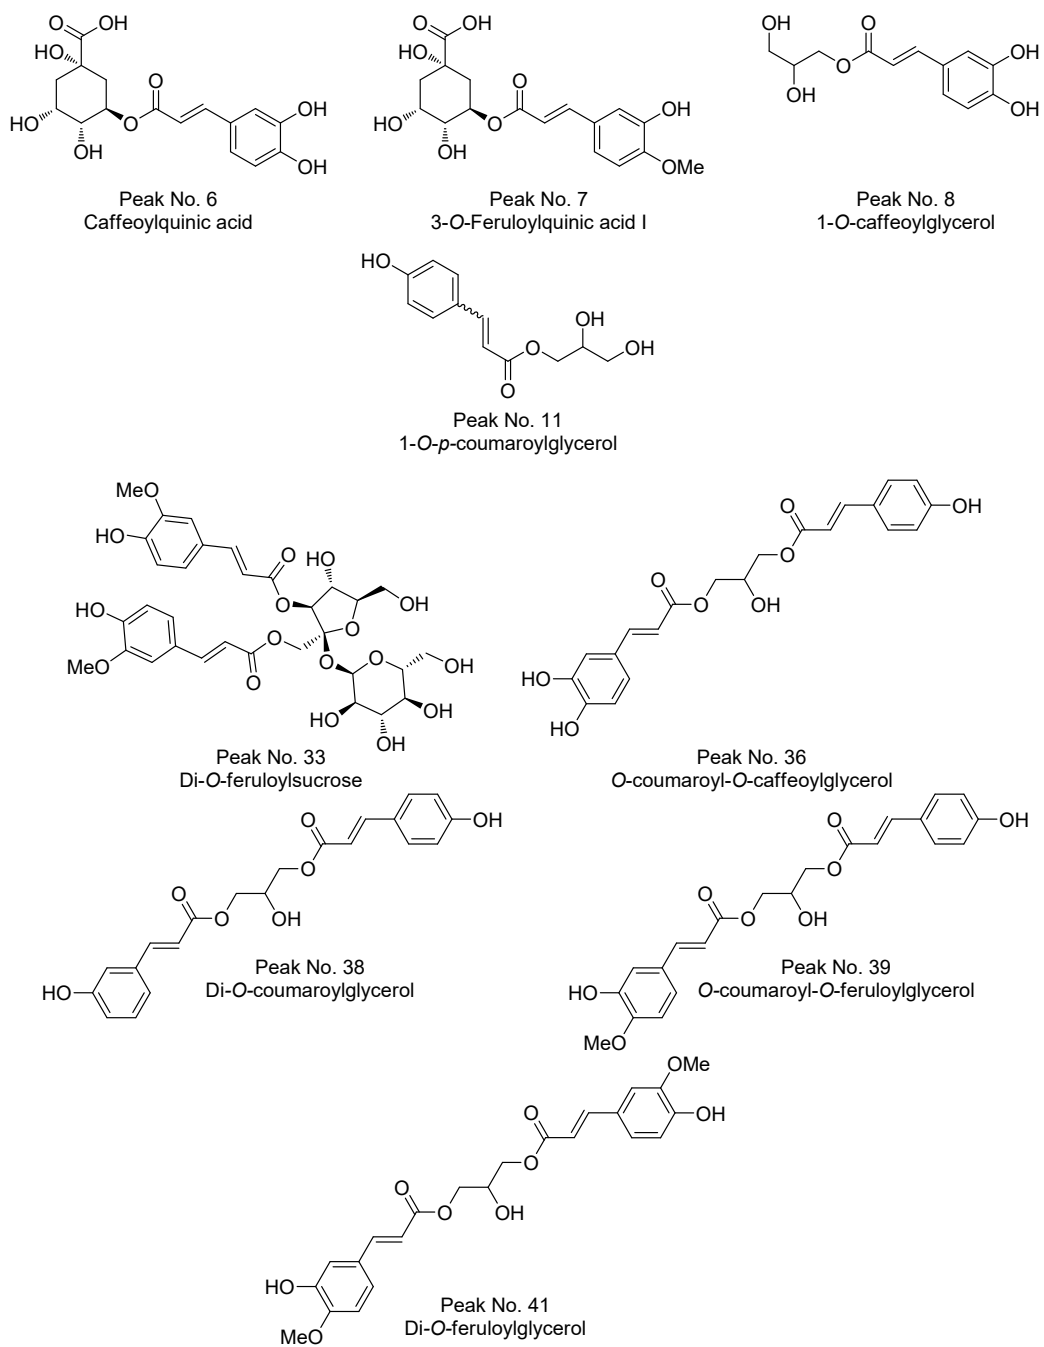

**Fig. S4.** Detected hydroxycinnamic acid derivatives in the examined extract.

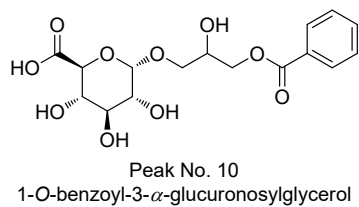

**Fig. S5.** Detected hydroxybenzoic acids derivatives in the examined extract.

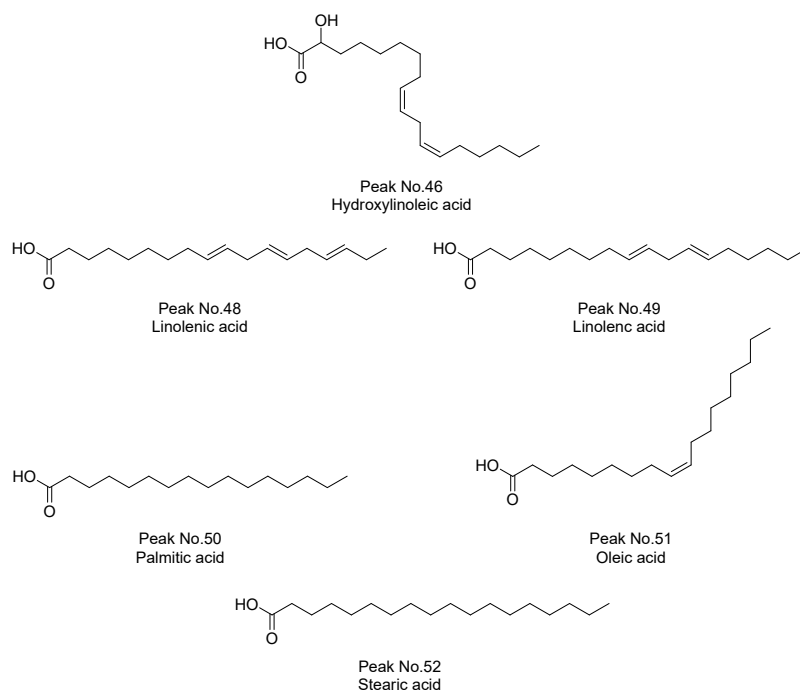

**Fig. S6.** Detected fatty acids in the examined extract.

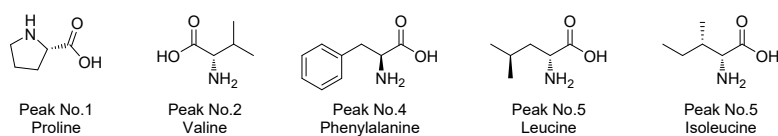

**Fig. S7.** Detected amino acids in the examined extract.

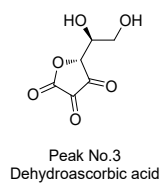

**Fig. S8.** Detected organic acids in the examined extract.

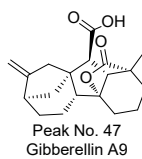

**Fig. S9.** Detected diterpenoid in the examined extract.

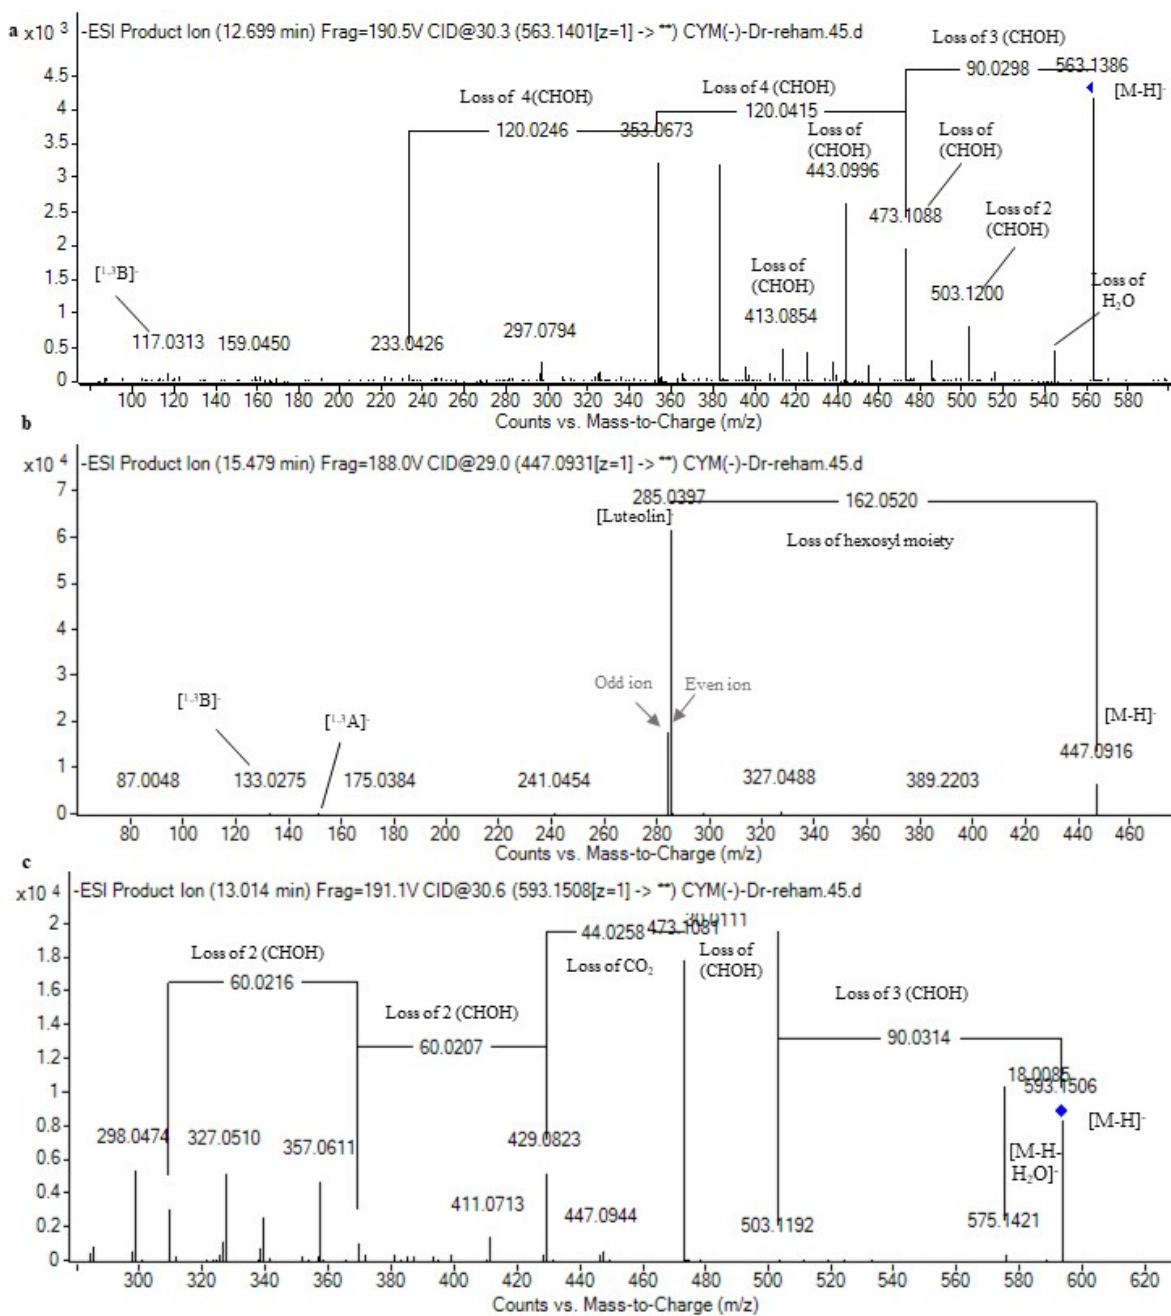

**Fig. S10.** Pattern of fragmentation of **a)** apigenin *C*-pentoside hexoside, **b)** luteolin *O* hexoside, **c)** luteolin *C* deoxyhexoside hexoside.

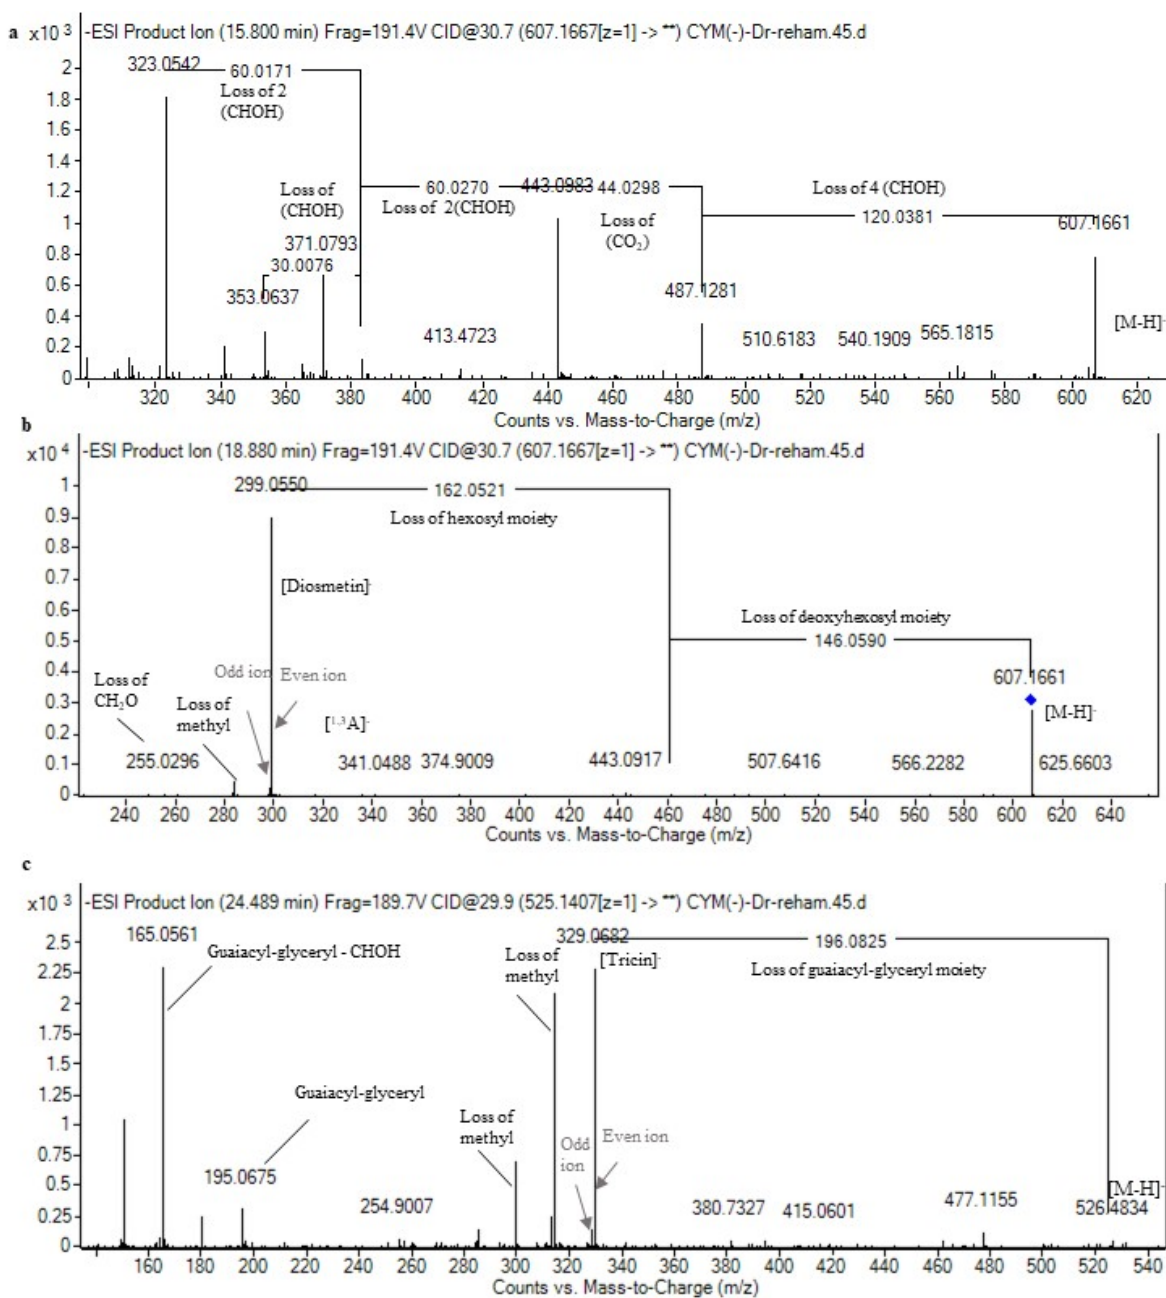

**Fig. S11.** Pattern of fragmentation of **a)** diosmetin *C*-deoxyhexoside hexoside, **b)** diosmetin *O*-deoxyhexoside hexoside, **c)** triclin 4'-*O*-( $\beta$ -guaiacyl-glyceryl) ether I.



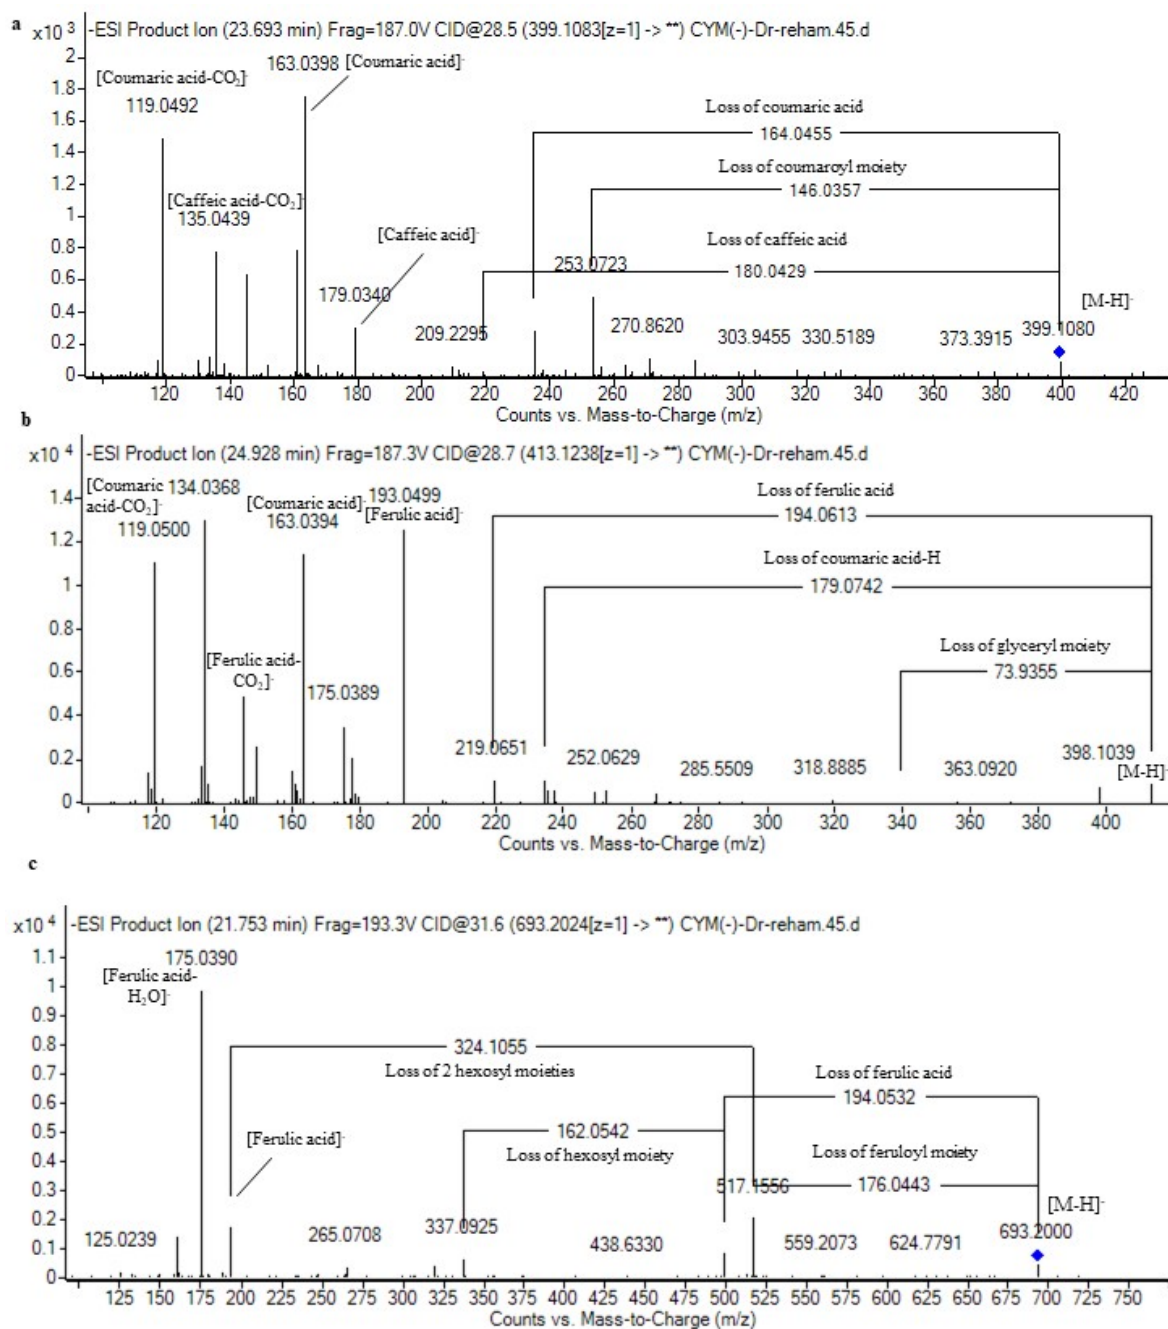

**Fig. S12.** Pattern of fragmentation of **a)** *O*-coumaroyl-*O*-caffeoylglycerol, **b)** *O*-coumaroyl-*O*-feruloylglycerol, **c)** Di-*O*-feruloylsucrose.

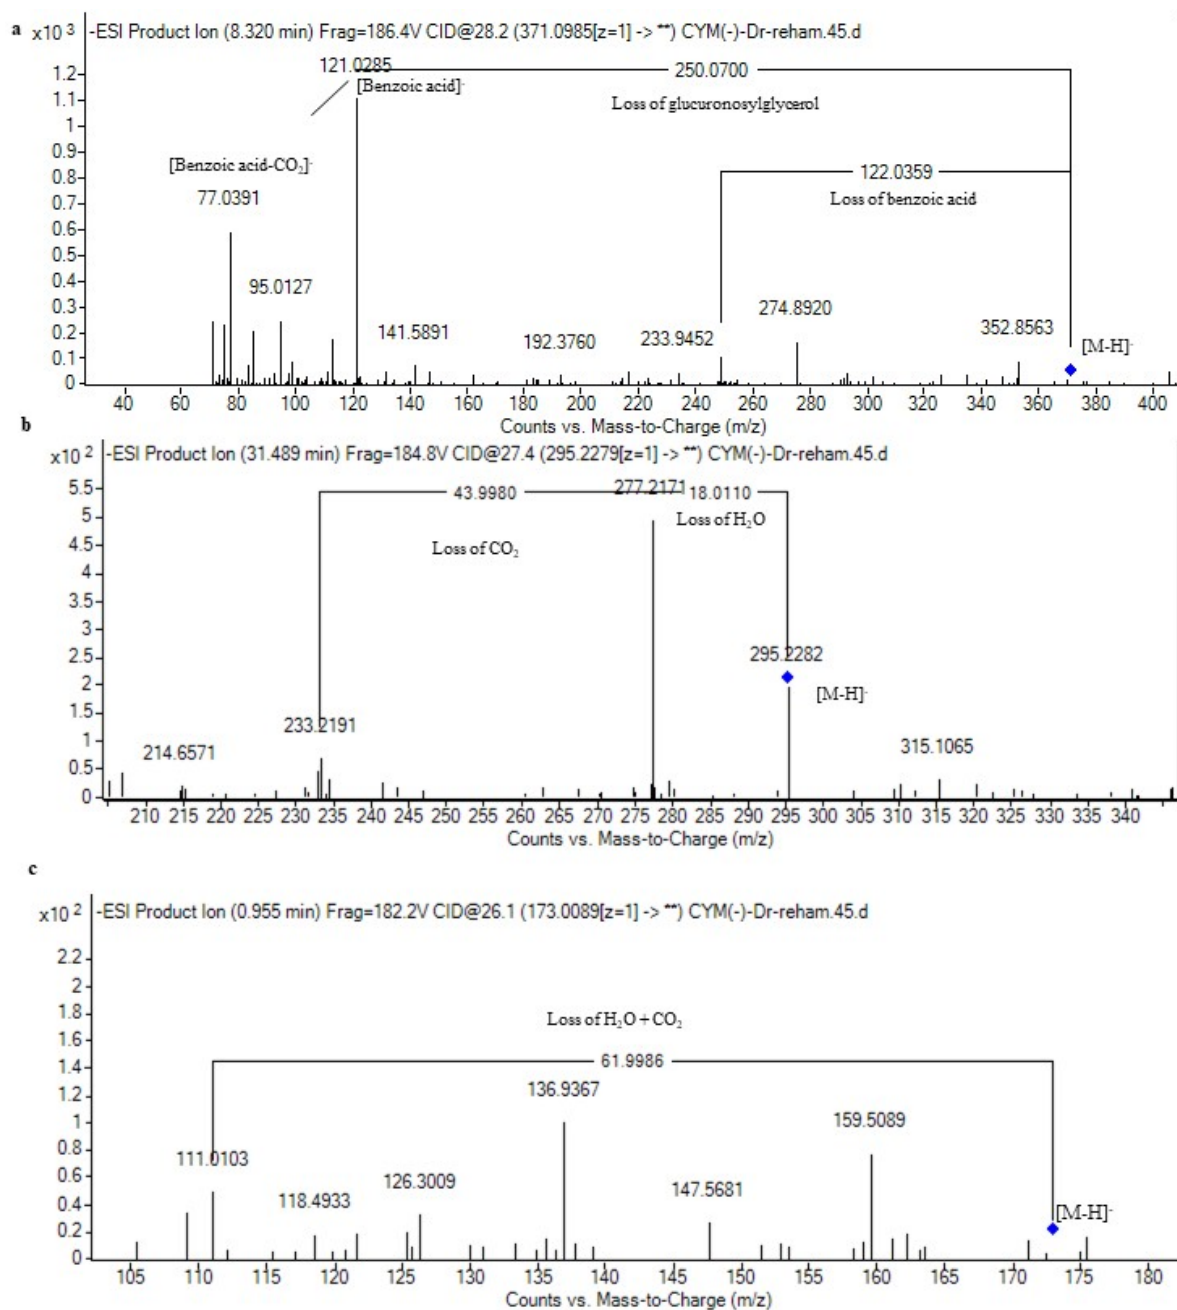

**Fig. S13.** Pattern of fragmentation of **a)** 1-O-benzoyl-3- $\alpha$ -glucuronosylglycerol, **b)** hydroxylinoleic acid, **c)** dehydroascorbic acid.
