# Supplementary material for: Deciphering the potential of Cymbopogon citratus (DC.) Stapf as an anti-obesity agent: phytochemical profiling, in vivo evaluations and molecular docking studies
Source: Royal Society of Chemistry journal article supplement (doi:10.1039/d4fo04602a), 2024-01-01
Supplement: d4fo04602a2.xlsx [file d4fo04602a2.xlsx]

## Sheet: Sheet1
		Glucose	Insulin	HOMA-IR		Choleste	TG	HDL	LDL		Apelin	Adiponectin		Apelin gen	APJ gene	Adiponectin gene
Control		88.3	14.6	3.18316		101.1	76.5	63.9	21.9		177.1	17.8		1	1	1
Control		87.1	15.5	3.33346		89.5	76.2	62.5	11.76		179.9	14.4		1	1	1
Control		89.5	13.8	3.04963		100.2	77.9	61.7	22.92		160.1	15.5		1	1	1
Control		89.8	15.3	3.39244		88.4	78.2	61.1	11.66		166.6	17.9		1	1	1
Control		84.5	10.1	2.10728		95.9	75.9	60.6	20.12		179.9	14.6		1	1	1
Control		93.9	10.4	2.41126		96.4	74.9	60.9	20.52		178.6	17.3		1	1	1
Control		87.9	11.9	2.58274		92.5	75.4	59.9	17.52		168.7	17.1		1	1	1
Control		91.4	11.5	2.59531		93.1	75.5	60.7	17.3		173.4	14.9		1	1	1
Control		85.6	15.1	3.19151		100.6	78.3	60.3	24.64		175.5	14.7		1	1	1
Control		96.4	10.9	2.59447		89.5	76.5	61.5	12.7		180.5	14.8		1	1	1
HCHFD		177.8	7.4	3.24869		158.4	146.5	27.5	101.6		130.5	7.7		0.41	0.044	0.33
HCHFD		159.3	11.9	4.68067		165.9	182.5	29.5	99.9		133.3	7.6		0.45	0.47	0.35
HCHFD		161.1	12.9	5.13133		175.1	154.8	30.1	114.04		145.6	5.3		0.39	0.37	0.34
HCHFD		169.6	6.5	2.72198		174.5	132.7	26.9	121.06		148.6	5.6		0.38	0.39	0.31
HCHFD		179.9	7.8	3.46474		160.5	176.6	27.4	97.78		129.8	6.6		0.47	0.49	0.37
HCHFD		161.3	12.6	5.01822		173.8	139.3	27.3	118.64		127.7	6.7		0.44	0.51	0.38
HCHFD		185.5	6.7	3.06877		162.6	158.2	28.4	102.56		129.2	6.9		0.42	0.48	0.39
HCHFD		179.9	11.7	5.19711		176.1	141.5	28.9	118.9		144.4	7.1		0.34	0.41	0.29
HCHFD		170.5	7.8	3.2837		169.4	151.5	28.8	110.3		127.1	5.9		0.33	0.37	0.3
HCHFD		169.8	11.9	4.98919		176.7	147.1	27.9	119.38		125.9	5.5		0.36	0.39	0.28
C. citratus		90.9	13.6	3.05244		95.5	77.6	63.9	16.08		165.3	18.1		1.3	1.1	1.55
C. citratus		93.7	15.5	3.58605		101.6	78.5	62.8	23.1		166.6	17.9		1.22	1.23	1.91
C. citratus		89.9	11.7	2.59711		90.1	81.5	61.9	11.9		177.2	14.8		1.56	1.34	1.87
C. citratus		88.6	12.1	2.64706		88.3	83.8	63.3	8.24		169.8	17.5		1.29	1.27	1.11
C. citratus		88.8	10.1	2.21452		95.5	85.1	63.1	15.38		160.1	17.7		1.11	1.31	1.44
C. citratus		91.1	14.9	3.35158		95.1	76.4	63.3	16.52		162.2	15.7		1.65	1.56	1.45
C. citratus		92.7	14.5	3.31889		94.9	76.9	63.7	15.82		163.3	16.6		1.66	1.47	1.39
C. citratus		87.7	10.5	2.2737		94.8	77.6	63.9	15.38		173.3	15.9		1.11	1.31	1.51
C. citratus		99.9	13.9	3.42867		92.4	78.6	64.4	12.28		171.1	16.1		0.99	0.99	1.49
C. citratus		86.8	13.7	2.9362		96.1	77.9	64.2	16.32		169.9	15.5		1.01	0.95	1.51
HCHFD+C. citratus		116.6	12.9	3.71393		112.7	101.5	52.8	39.6		156.1	12.1		0.68	0.69	0.57
HCHFD+C. citratus		111.1	10.8	2.96267		113.9	96.6	52.3	42.28		166.6	8.7		0.66	0.66	0.56
HCHFD+C. citratus		99.1	9.5	2.32457		124.9	100.4	43.6	61.22		150.1	11.9		0.64	0.69	0.55
HCHFD+C. citratus		99.9	12.5	3.08333		117.2	99.9	50.9	46.32		155.9	12.5		0.59	0.68	0.59
HCHFD+C. citratus		118.8	12.7	3.72533		115.9	98.2	51.4	44.86		160.5	12.8		0.65	0.71	0.58
HCHFD+C. citratus		100.5	10.8	2.68		124.3	97.9	51.9	52.82		156.6	11.7		0.64	0.73	0.56
HCHFD+C. citratus		118.8	13.5	3.96		126.1	97.5	53.1	53.5		169.7	11.9		0.65	0.74	0.57
HCHFD+C. citratus		115.5	12.7	3.62185		114.9	100.6	51.7	43.08		165.5	12.5		0.62	0.78	0.59
HCHFD+C. citratus		98.8	12.5	3.04938		111.9	99.3	51.1	40.94		149.5	12.7		0.61	0.65	0.55
HCHFD+C. citratus		109.9	10.1	2.74072		115.8	99.9	53.47	42.35		145.4	9.1		0.65	0.89	0.51
HCHFD+Orlistat		123.5	9.4	2.86642		122.7	96.8	50.9	52.44		149.1	8.7		0.54	0.59	0.44
HCHFD+Orlistat		139.9	9.9	3.41978		145.5	121.6	44.5	76.68		147.6	7.9		0.56	0.67	0.45
HCHFD+Orlistat		120.2	11.5	3.41309		146.9	116.5	45.9	77.7		140.5	8.9		0.59	0.58	0.42
HCHFD+Orlistat		145.6	11.3	4.06242		144.1	120.4	46.1	73.92		145.5	8.1		0.51	0.54	0.43
HCHFD+Orlistat		115.9	10.9	3.11928		143.6	117.1	46.2	73.98		139.7	9.7		0.59	0.57	0.44
HCHFD+Orlistat		124.4	9.1	2.79516		150.5	118.1	44.9	81.98		138.8	9.2		0.54	0.59	0.45
HCHFD+Orlistat		117.7	10.6	3.08054		149.9	116.8	43.8	82.74		130.9	7.5		0.51	0.66	0.47
HCHFD+Orlistat		141.1	10.8	3.76267		148.3	116.4	43.9	81.12		135.5	8.5		0.59	0.49	0.48
HCHFD+Orlistat		137.3	10.1	3.42402		140.7	117.9	44.9	72.22		143.7	7.9		0.59	0.81	0.48
HCHFD+Orlistat		119.9	11.2	3.31575		141.1	121.2	45.9	70.96		149.9	7.8		0.52	0.72	0.48
